# Supplementary material
Source: ML conference proceedings conference paper supplement (https://aclanthology.org/2021.humeval-1.12)
Supplement: Dataset [file Coherence_Task.pdf › direct-intrinsic-evaluation/Test_results/Coherence_Task.pdf]

## **Default Question Block**

### **Outlier detection test Quine**

**Thank you for participating in this study.**

**This test consists of 60 questions and will take approximately 45 minutes.**

**The questions posed concern terms used by Quine. In the middle of the test, so after 30 questions, there is a small break. After finishing the test, you will be asked to answer a couple of questions reflecting on the test.**

**Please fill out this task in a quiet room with no distractions. You are allowed to look up the meaning of a word, but please do not discuss the meaning with someone else.**

**You will now first be asked to sign a consent form, then you will receive more specific instructions on the task.**

#### **Informed consent form**

**‘I hereby declare that I have been clearly informed about the research project as described in the information brochure. My questions have been answered to my satisfaction.**

**I consent to participate in this research on an entirely voluntary basis. I retain the right to revoke this consent without having to provide any reasons for my decision. I am aware that I am entitled to discontinue the research at any time and can withdraw my participation up to 8 days after the research has ended. If I decide to stop or withdraw my consent, all the information gathered up until then will be**

permanently deleted.

If my research results are used in scientific publications or made public in any other way, they will be fully anonymised. My personal information may not be viewed by third parties without my express permission.

If I need any further information on the research, now or in the future, I can contact the researchers.'

Click to write the question text

×

SIGN HERE

clear

### Test instructions

In the following questions you will be asked to select the word that does not belong to the group.

An example of such a group would be {*cat, dog, banana, mouse*}, where *banana* is the outlier.

If you do not know the meaning of a word you are allowed to look it up, but please do not discuss it with anybody else.

Please take the option words literally, if misspelled please do not interpret what word was actually meant, but judge it as it is written.

If no three words from the option words form a coherent group, please select the options 'No coherent group can be formed from these words'. Please only select this option if you are unable to find any sort of relation that exists between three of the words.

**These page timer metrics will not be displayed to the recipient.**

First Click: *0 seconds*

Last Click: *0 seconds*

Page Submit: *0 seconds*

Click Count: *0 clicks*

**1. What word does not belong to the group?**

- |                                                                        |                               |
|------------------------------------------------------------------------|-------------------------------|
| <input type="radio"/> Parts                                            | <input type="radio"/> Reality |
| <input type="radio"/> Reduction                                        | <input type="radio"/> Nouns   |
| <input type="radio"/> No coherent group can be formed from these words |                               |

**These page timer metrics will not be displayed to the recipient.**

First Click: *0 seconds*

Last Click: *0 seconds*

Page Submit: *0 seconds*

Click Count: *0 clicks*

**2, What word does not belong to the group?**

- |                                                                        |                                |
|------------------------------------------------------------------------|--------------------------------|
| <input type="radio"/> Reduction                                        | <input type="radio"/> Direct   |
| <input type="radio"/> Forms                                            | <input type="radio"/> Dwindles |
| <input type="radio"/> No coherent group can be formed from these words |                                |

**These page timer metrics will not be displayed to the recipient.**

First Click: *0 seconds*

Last Click: *0 seconds*

Page Submit: *0 seconds*

Click Count: *0 clicks*

**3. What word does not belong to the group?**

- ☐ Behavior
- ☐ Behaviour
- ☐ Fabric
- ☐ Dispositions
- ☐ No coherent group can be formed from these words

**These page timer metrics will not be displayed to the recipient.**

First Click: *0 seconds*

Last Click: *0 seconds*

Page Submit: *0 seconds*

Click Count: *0 clicks*

#### 4. What word does not belong to the group?

- ☐ Memory
- ☐ Ordered Pair
- ☐ Reduction
- ☐ Truths
- ☐ No coherent group can be formed from these words

**These page timer metrics will not be displayed to the recipient.**

First Click: *0 seconds*

Last Click: *0 seconds*

Page Submit: *0 seconds*

Click Count: *0 clicks*

#### 5. What word does not belong to the group?

- ☐ Ordered Pair
- ☐ Conditionals
- ☐ Truth Vehicle
- ☐ Discourse
- ☐ No coherent group can be formed from these words

**These page timer metrics will not be displayed to the recipient.**

First Click: *0 seconds*

Last Click: *0 seconds*

Page Submit: *0 seconds*

Click Count: *0 clicks*

### 6. What word does not belong to the group?

- ☐ Construction
- ☐ Divisibility
- ☐ Sense Datum
- ☐ Prediction
- ☐ No coherent group can be formed from these words

**These page timer metrics will not be displayed to the recipient.**

First Click: *0 seconds*

Last Click: *0 seconds*

Page Submit: *0 seconds*

Click Count: *0 clicks*

### 7. What word does not belong to the group?

- ☐ Sense Datum
- ☐ Individuatives
- ☐ DI
- ☐ Picks
- ☐ No coherent group can be formed from these words

**These page timer metrics will not be displayed to the recipient.**

First Click: *0 seconds*

Last Click: *0 seconds*

Page Submit: *0 seconds*

Click Count: *0 clicks*

### 8. What word does not belong to the group?

- ☐ Remain
- ☐ Dicto
- ☐ Irremediably
- ☐ Propositional Attitudes
- ☐ No coherent group can be formed from these

words

**These page timer metrics will not be displayed to the recipient.**

First Click: *0 seconds*

Last Click: *0 seconds*

Page Submit: *0 seconds*

Click Count: *0 clicks*

**9. What word does not belong to the group?**

- ☐ Prediction
- ☐ Expectation
- ☐ Fell
- ☐ Successful
- ☐ No coherent group can be formed from these words

**These page timer metrics will not be displayed to the recipient.**

First Click: *0 seconds*

Last Click: *0 seconds*

Page Submit: *0 seconds*

Click Count: *0 clicks*

**10. What word does not belong to the group?**

- ☐ Truth Functions
- ☐ Terms
- ☐ Immanently
- ☐ Etc
- ☐ No coherent group can be formed from these words

**These page timer metrics will not be displayed to the recipient.**

First Click: *0 seconds*

Last Click: *0 seconds*

Page Submit: *0 seconds*

Click Count: *0 clicks*

**11. What word does not belong to the group?**

- |                                                                        |                                  |
|------------------------------------------------------------------------|----------------------------------|
| <input type="radio"/> Intensions                                       | <input type="radio"/> Prediction |
| <input type="radio"/> Yielding                                         | <input type="radio"/> Names      |
| <input type="radio"/> No coherent group can be formed from these words |                                  |

**These page timer metrics will not be displayed to the recipient.**

First Click: *0 seconds*

Last Click: *0 seconds*

Page Submit: *0 seconds*

Click Count: *0 clicks*

**12. What word does not belong to the group?**

- |                                                                        |                                |
|------------------------------------------------------------------------|--------------------------------|
| <input type="radio"/> Propositional Attitudes                          | <input type="radio"/> Pronouns |
| <input type="radio"/> Posit                                            | <input type="radio"/> Desired  |
| <input type="radio"/> No coherent group can be formed from these words |                                |

**These page timer metrics will not be displayed to the recipient.**

First Click: *0 seconds*

Last Click: *0 seconds*

Page Submit: *0 seconds*

Click Count: *0 clicks*

**13. What word does not belong to the group?**

- |                                                                        |                                    |
|------------------------------------------------------------------------|------------------------------------|
| <input type="radio"/> Touched                                          | <input type="radio"/> Does         |
| <input type="radio"/> Dispositional                                    | <input type="radio"/> Conditioning |
| <input type="radio"/> No coherent group can be formed from these words |                                    |

**These page timer metrics will not be displayed to the recipient.**

First Click: *0 seconds*

Last Click: *0 seconds*

Page Submit: *0 seconds*

Click Count: *0 clicks*

#### 14. What word does not belong to the group?

- ☐ Objects
- ☐ Physical
- ☐ Them
- ☐ Object
- ☐ No coherent group can be formed from these words

**These page timer metrics will not be displayed to the recipient.**

First Click: *0 seconds*

Last Click: *0 seconds*

Page Submit: *0 seconds*

Click Count: *0 clicks*

#### 15. What word does not belong to the group?

- ☐ Ambiguity
- ☐ Believe
- ☐ Parts
- ☐ Phoneme
- ☐ No coherent group can be formed from these words

**These page timer metrics will not be displayed to the recipient.**

First Click: *0 seconds*

Last Click: *0 seconds*

Page Submit: *0 seconds*

Click Count: *0 clicks*

#### 16. What word does not belong to the group?

- ☐ Metaphysics
- ☐ Numbers



- ☐ Truth Vehicles ☐ Prediction
- ☐ No coherent group can be formed from these words

**These page timer metrics will not be displayed to the recipient.**

First Click: *0 seconds*

Last Click: *0 seconds*

Page Submit: *0 seconds*

Click Count: *0 clicks*

### 17. What word does not belong to the group?

- ☐ Truth Functions ☐ Application
- ☐ Variables ☐ Phoneme
- ☐ No coherent group can be formed from these words

**These page timer metrics will not be displayed to the recipient.**

First Click: *0 seconds*

Last Click: *0 seconds*

Page Submit: *0 seconds*

Click Count: *0 clicks*

### 18. What word does not belong to the group?

- ☐ Existential ☐ Logic
- ☐ Quantification ☐ Universal
- ☐ No coherent group can be formed from these words

**These page timer metrics will not be displayed to the recipient.**

First Click: *0 seconds*

Last Click: *0 seconds*

Page Submit: *0 seconds*

Click Count: 0 clicks

### 19. What word does not belong to the group?

- ☐ About
- ☐ Regarding
- ☐ No coherent group can be formed from these words
- ☐ He
- ☐ World

**These page timer metrics will not be displayed to the recipient.**

First Click: 0 seconds

Last Click: 0 seconds

Page Submit: 0 seconds

Click Count: 0 clicks

### 20. What word does not belong to the group?

- ☐ Nominalism
- ☐ Fi
- ☐ No coherent group can be formed from these words
- ☐ Forth
- ☐ Responsive

**These page timer metrics will not be displayed to the recipient.**

First Click: 0 seconds

Last Click: 0 seconds

Page Submit: 0 seconds

Click Count: 0 clicks

### 21. What word does not belong to the group?

- ☐ Inculcated
- ☐ Conditioning
- ☐ No coherent group can be formed from these words
- ☐ Intake
- ☐ Direct

**These page timer metrics will not be displayed to the recipient.**

First Click: *0 seconds*

Last Click: *0 seconds*

Page Submit: *0 seconds*

Click Count: *0 clicks*

**22. What word does not belong to the group?**

- |                                                                        |                                    |
|------------------------------------------------------------------------|------------------------------------|
| <input type="radio"/> Time                                             | <input type="radio"/> Conditionals |
| <input type="radio"/> Conditioning                                     | <input type="radio"/> Skepticism   |
| <input type="radio"/> No coherent group can be formed from these words |                                    |

**These page timer metrics will not be displayed to the recipient.**

First Click: *0 seconds*

Last Click: *0 seconds*

Page Submit: *0 seconds*

Click Count: *0 clicks*

**23. What word does not belong to the group?**

- |                                                                        |                              |
|------------------------------------------------------------------------|------------------------------|
| <input type="radio"/> Reduction                                        | <input type="radio"/> Stuff  |
| <input type="radio"/> Conditioning                                     | <input type="radio"/> Memory |
| <input type="radio"/> No coherent group can be formed from these words |                              |

**These page timer metrics will not be displayed to the recipient.**

First Click: *0 seconds*

Last Click: *0 seconds*

Page Submit: *0 seconds*

Click Count: *0 clicks*

**24. What word does not belong to the group?**

- ☐ Truth Functions
- ☐ Even
- ☐ No coherent group can be formed from these words
- ☐ Ambiguity
- ☐ Parts

**These page timer metrics will not be displayed to the recipient.**

First Click: 0 seconds

Last Click: 0 seconds

Page Submit: 0 seconds

Click Count: 0 clicks

## 25. What word does not belong to the group?

- ☐ Inflations
- ☐ Reduction
- ☐ No coherent group can be formed from these words
- ☐ Formulation
- ☐ Reductions

**These page timer metrics will not be displayed to the recipient.**

First Click: 0 seconds

Last Click: 0 seconds

Page Submit: 0 seconds

Click Count: 0 clicks

## 26. What word does not belong to the group?

- ☐ Instantiation
- ☐ Else
- ☐ No coherent group can be formed from these words
- ☐ Ôimpliesõ
- ☐ Ambiguity

**These page timer metrics will not be displayed to the recipient.**

First Click: 0 seconds

Last Click: 0 seconds

Page Submit: 0 seconds

Click Count: 0 clicks

### 27. What word does not belong to the group?

- ☐ Ordered Pair
- ☐ Auxiliary
- ☐ No coherent group can be formed from these words
- ☐ Ctx
- ☐ Insidious

**These page timer metrics will not be displayed to the recipient.**

First Click: 0 seconds

Last Click: 0 seconds

Page Submit: 0 seconds

Click Count: 0 clicks

### 28. What word does not belong to the group?

- ☐ Dispositions
- ☐ Understand
- ☐ No coherent group can be formed from these words
- ☐ Physicalism
- ☐ Ambiguity

**These page timer metrics will not be displayed to the recipient.**

First Click: 0 seconds

Last Click: 0 seconds

Page Submit: 0 seconds

Click Count: 0 clicks

### 29. What word does not belong to the group?

- ☐ Pronouns
- ☐ Quantification
- ☐ No coherent group can be formed from these
- ☐ Ambiguity
- ☐ Propositional Attitudes

words

**These page timer metrics will not be displayed to the recipient.**

First Click: *0 seconds*

Last Click: *0 seconds*

Page Submit: *0 seconds*

Click Count: *0 clicks*

### 30. What word does not belong to the group?

- ☐ Objects
- ☐ Generalization
- ☐ No coherent group can be formed from these words
- ☐ There
- ☐ Cooperating

## Break

**You are now halfway through the test.**

**You can take a small break, and go to the next page whenever you are ready to continue.**

**These page timer metrics will not be displayed to the recipient.**

First Click: *0 seconds*

Last Click: *0 seconds*

Page Submit: *0 seconds*

Click Count: *0 clicks*

### 31. What word does not belong to the group?

- ☐ Intensional Abstraction
- ☐ Say
- ☐ No coherent group can be formed from these words
- ☐ Honoured
- ☐ Wre

**These page timer metrics will not be displayed to the recipient.**

First Click: *0 seconds*

Last Click: *0 seconds*

Page Submit: *0 seconds*

Click Count: *0 clicks*

**32. What word does not belong to the group?**

- ☐ Equity
- ☐ Spelling
- ☐ No coherent group can be formed from these words
- ☐ Referen
- ☐ Intensional Abstraction

**These page timer metrics will not be displayed to the recipient.**

First Click: *0 seconds*

Last Click: *0 seconds*

Page Submit: *0 seconds*

Click Count: *0 clicks*

**33. What word does not belong to the group?**

- ☐ Time
- ☐ Constructivism
- ☐ No coherent group can be formed from these words
- ☐ Numbers
- ☐ Truth Vehicles

**These page timer metrics will not be displayed to the recipient.**

First Click: *0 seconds*

Last Click: *0 seconds*

Page Submit: *0 seconds*

Click Count: *0 clicks*

**34. What word does not belong to the group?**

- ☐ Nominalism
- ☐ Empiricist
- ☐ No coherent group can be formed from these words
- ☐ Disavowals
- ☐ Realism

**These page timer metrics will not be displayed to the recipient.**

First Click: *0 seconds*

Last Click: *0 seconds*

Page Submit: *0 seconds*

Click Count: *0 clicks*

### 35. What word does not belong to the group?

- ☐ Meaning
- ☐ Intensional Abstraction
- ☐ No coherent group can be formed from these words
- ☐ Density
- ☐ Translation

**These page timer metrics will not be displayed to the recipient.**

First Click: *0 seconds*

Last Click: *0 seconds*

Page Submit: *0 seconds*

Click Count: *0 clicks*

### 36. What word does not belong to the group?

- ☐ Truth Vehicles
- ☐ Reworking
- ☐ No coherent group can be formed from these words
- ☐ Surrogate
- ☐ Xiii

**These page timer metrics will not be displayed to the recipient.**

First Click: *0 seconds*

Last Click: *0 seconds*



Page Submit: *0 seconds*

Click Count: *0 clicks*

### 37. What word does not belong to the group?

- ☐ Remember
- ☐ Words
- ☐ Nominalism
- ☐ Parts
- ☐ No coherent group can be formed from these words

**These page timer metrics will not be displayed to the recipient.**

First Click: *0 seconds*

Last Click: *0 seconds*

Page Submit: *0 seconds*

Click Count: *0 clicks*

### 38. What word does not belong to the group?

- ☐ Propositional Attitudes
- ☐ Reached
- ☐ Probably
- ☐ Manifestation
- ☐ No coherent group can be formed from these words

**These page timer metrics will not be displayed to the recipient.**

First Click: *0 seconds*

Last Click: *0 seconds*

Page Submit: *0 seconds*

Click Count: *0 clicks*

### 39. What word does not belong to the group?

- ☐ Maxim
- ☐ Memory
- ☐ Mentalistic
- ☐ Dispositions
- ☐ No coherent group can be formed from these

words

**These page timer metrics will not be displayed to the recipient.**

First Click: *0 seconds*

Last Click: *0 seconds*

Page Submit: *0 seconds*

Click Count: *0 clicks*

**40. What word does not belong to the group?**

- |                                                                        |                                |
|------------------------------------------------------------------------|--------------------------------|
| <input type="radio"/> Conditionals                                     | <input type="radio"/> Truth    |
| <input type="radio"/> Therewith                                        | <input type="radio"/> Geometry |
| <input type="radio"/> No coherent group can be formed from these words |                                |

**These page timer metrics will not be displayed to the recipient.**

First Click: *0 seconds*

Last Click: *0 seconds*

Page Submit: *0 seconds*

Click Count: *0 clicks*

**41. What word does not belong to the group?**

- |                                                                        |                                |
|------------------------------------------------------------------------|--------------------------------|
| <input type="radio"/> Permutations                                     | <input type="radio"/> Times    |
| <input type="radio"/> Mentalistic                                      | <input type="radio"/> Contexts |
| <input type="radio"/> No coherent group can be formed from these words |                                |

**These page timer metrics will not be displayed to the recipient.**

First Click: *0 seconds*

Last Click: *0 seconds*

Page Submit: *0 seconds*

Click Count: *0 clicks*

**42. What word does not belong to the group?**

- ☐ Typical
- ☐ Yey
- ☐ No coherent group can be formed from these words
- ☐ Ambiguity
- ☐ Proper

**These page timer metrics will not be displayed to the recipient.**

First Click: *0 seconds*

Last Click: *0 seconds*

Page Submit: *0 seconds*

Click Count: *0 clicks*

**43. What word does not belong to the group?**

- ☐ Object
- ☐ Observation Sentences
- ☐ No coherent group can be formed from these words
- ☐ Objects
- ☐ Thus

**These page timer metrics will not be displayed to the recipient.**

First Click: *0 seconds*

Last Click: *0 seconds*

Page Submit: *0 seconds*

Click Count: *0 clicks*

**44. What word does not belong to the group?**

- ☐ Vitally
- ☐ Mentalistic
- ☐ No coherent group can be formed from these words
- ☐ Criticisms
- ☐ Acceptable

**These page timer metrics will not be displayed to the recipient.**

First Click: *0 seconds*

Last Click: *0 seconds*

Page Submit: *0 seconds*

Click Count: *0 clicks*

#### 45. What word does not belong to the group?

- ☐ Sense Datum
- ☐ Flimsy
- ☐ No coherent group can be formed from these words
- ☐ Smooth
- ☐ Bones

**These page timer metrics will not be displayed to the recipient.**

First Click: *0 seconds*

Last Click: *0 seconds*

Page Submit: *0 seconds*

Click Count: *0 clicks*

#### 46. What word does not belong to the group?

- ☐ Likewise
- ☐ Apple
- ☐ No coherent group can be formed from these words
- ☐ Immanently
- ☐ Quantification

**These page timer metrics will not be displayed to the recipient.**

First Click: *0 seconds*

Last Click: *0 seconds*

Page Submit: *0 seconds*

Click Count: *0 clicks*

#### 47. What word does not belong to the group?

- ☐ Desirable
- ☐ Divided Reference

- ☐ About ☐ Pronouns
- ☐ No coherent group can be formed from these words

**These page timer metrics will not be displayed to the recipient.**

First Click: *0 seconds*

Last Click: *0 seconds*

Page Submit: *0 seconds*

Click Count: *0 clicks*

**48. What word does not belong to the group?**

- ☐ Programming ☐ Necessity
- ☐ Overlaid ☐ Reality
- ☐ No coherent group can be formed from these words

**These page timer metrics will not be displayed to the recipient.**

First Click: *0 seconds*

Last Click: *0 seconds*

Page Submit: *0 seconds*

Click Count: *0 clicks*

**49. What word does not belong to the group?**

- ☐ Objects ☐ Categorical
- ☐ About ☐ Posit
- ☐ No coherent group can be formed from these words

**These page timer metrics will not be displayed to the recipient.**

First Click: *0 seconds*

Last Click: *0 seconds*

Page Submit: *0 seconds*

Click Count: 0 clicks

**50. What word does not belong to the group?**

- ☐ Pronouns
- ☐ Pronoun
- ☐ No coherent group can be formed from these words
- ☐ Job
- ☐ Exterior

**These page timer metrics will not be displayed to the recipient.**

First Click: 0 seconds

Last Click: 0 seconds

Page Submit: 0 seconds

Click Count: 0 clicks

**51. What word does not belong to the group?**

- ☐ Truth Functions
- ☐ Existential
- ☐ No coherent group can be formed from these words
- ☐ Quantification
- ☐ Elementary

**These page timer metrics will not be displayed to the recipient.**

First Click: 0 seconds

Last Click: 0 seconds

Page Submit: 0 seconds

Click Count: 0 clicks

**52. What word does not belong to the group?**

- ☐ Answering
- ☐ Descriptions
- ☐ No coherent group can be formed from these words
- ☐ Designation
- ☐ About

**These page timer metrics will not be displayed to the recipient.**

First Click: *0 seconds*

Last Click: *0 seconds*

Page Submit: *0 seconds*

Click Count: *0 clicks*

**53. What word does not belong to the group?**

- ☐ Assuring
- ☐ Ordered Pair
- ☐ Constitutes
- ☐  $\beta$
- ☐ No coherent group can be formed from these words

**These page timer metrics will not be displayed to the recipient.**

First Click: *0 seconds*

Last Click: *0 seconds*

Page Submit: *0 seconds*

Click Count: *0 clicks*

**54. What word does not belong to the group?**

- ☐ Part
- ☐ Parts
- ☐ Spatially
- ☐ Space
- ☐ No coherent group can be formed from these words

**These page timer metrics will not be displayed to the recipient.**

First Click: *0 seconds*

Last Click: *0 seconds*

Page Submit: *0 seconds*

Click Count: *0 clicks*

**55. What word does not belong to the group?**

- ☐ Absolutely
- ☐ Dispositions
- ☐ No coherent group can be formed from these words
- ☐ Attributed
- ☐ Acceptable

**These page timer metrics will not be displayed to the recipient.**

First Click: *0 seconds*

Last Click: *0 seconds*

Page Submit: *0 seconds*

Click Count: *0 clicks*

### 56. What word does not belong to the group?

- ☐ Circumstances
- ☐ Monica
- ☐ No coherent group can be formed from these words
- ☐ Reality
- ☐ Unsullied

**These page timer metrics will not be displayed to the recipient.**

First Click: *0 seconds*

Last Click: *0 seconds*

Page Submit: *0 seconds*

Click Count: *0 clicks*

### 57. What word does not belong to the group?

- ☐ Thatí
- ☐ Pronouns
- ☐ No coherent group can be formed from these words
- ☐ For
- ☐ Tenuous

**These page timer metrics will not be displayed to the recipient.**

First Click: *0 seconds*

Last Click: *0 seconds*



Page Submit: 0 seconds

Click Count: 0 clicks

**58. What word does not belong to the group?**

- ☐ Truth Vehicles
- ☐ Prolonged
- ☐ No coherent group can be formed from these words
- ☐ Quarks
- ☐ Pernicious

**These page timer metrics will not be displayed to the recipient.**

First Click: 0 seconds

Last Click: 0 seconds

Page Submit: 0 seconds

Click Count: 0 clicks

**59. What word does not belong to the group?**

- ☐ Conditional
- ☐ Conditionals
- ☐ No coherent group can be formed from these words
- ☐ Categoricals
- ☐ Joint

**These page timer metrics will not be displayed to the recipient.**

First Click: 0 seconds

Last Click: 0 seconds

Page Submit: 0 seconds

Click Count: 0 clicks

**60. What word does not belong to the group?**

- ☐ Parts
- ☐ Name
- ☐ No coherent group can be formed from these
- ☐ Summed
- ☐ Total

words

**Thank you for filling out all of the questions.**

**In this final part of the test a couple of reflective questions are asked. Please answer them truthfully to your experience.**

**Generally, how difficult did you find it to identify the outlier?**

**On what did you mostly base your choice of the outlier?**

**Have you looked up many definitions?**

**If so, what source did you use and did it help you? Do you think it has influenced any of your answers?**

**Do you think your answers would differ from someone who has not studied the work of Quine?**

**Do you have any other comments or remarks about the test in general?**

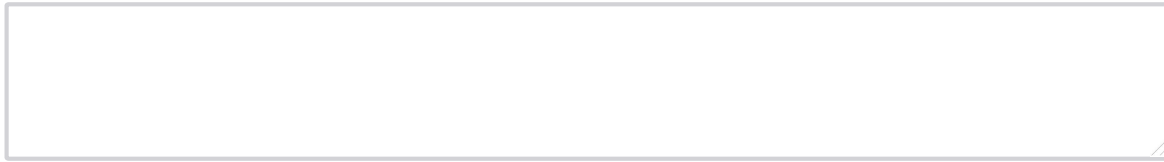

**Thank you so much for participating in this study!**

Powered by Qualtrics
