# Supplementary material
Source: ML conference proceedings conference paper supplement (https://aclanthology.org/2021.humeval-1.12)
Supplement: Dataset [file Pilot.pdf › direct-intrinsic-evaluation/Test_results/Pilot.pdf]

## **Default Question Block**

### **Pilot study**

**Thank you for participating in this pilot study, which will be used to refine the actual study. The pilot will consist of four parts. Firstly, you will be asked to sign an informed consent form. Next, fifteen questions are asked on the relatedness of words. Continuing, ten questions follow in which you are asked to identify an outlier in a group of words. The pilot ends with a couple of reflection questions.**

**Please fill out this task in a quiet room with no distractions. You are allowed to look up the meaning of a word, but please do not ask anyone else and do not discuss your answers with anyone. Before each part you will receive more specific instructions.**

### **Informed consent form**

**‘I hereby declare that I have been clearly informed about the research project as described in the information brochure. My questions have been answered to my satisfaction.**

**I consent to participate in this research on an entirely voluntary basis. I retain the right to revoke this consent without having to provide any reasons for my decision. I am aware that I am entitled to discontinue the research at any time and can withdraw my participation up to 8 days after the research has ended. If I decide to stop or withdraw my consent, all the information gathered up until then will be permanently deleted.**

**If my research results are used in scientific publications or made public in any other way, they will be fully anonymised. My personal information may not be viewed by third parties without my express**

permission.

If I need any further information on the research, now or in the future, I can contact the researchers.'

Click to write the question text

×

SIGN HERE

clear

### Relatedness questions

In the following fifteen questions you will be asked to select the word that is most related to a given target word. Relatedness is defined as the following relations:

- words that have a similar meaning (synonymy), e.g. 'car' and 'vehicle'
- relation between the part and the whole (meronymy), e.g. 'car' and 'wheel'
- one word is a super term of the other (hyperonymy) e.g. 'animal' and 'monkey'
- word share a super term, e.g. 'dog' and 'cat'
- other types of conceptual relations

All the target words are terms used by philosopher Willard Von Orman Quine, so please keep his usage and definitions in mind when answering the questions. If none of the options are sufficiently related to the target word, or if you do not know the meaning of all the options, please select the option 'None of these words is even remotely related'. You are allowed to look up the meaning of a word, but please do not discuss the meaning with someone else.

These page timer metrics will not be displayed to the recipient.

First Click: 0 seconds

Last Click: 0 seconds

Page Submit: *0 seconds*

Click Count: *0 clicks*

### 1. What word is most related to 'Physicalism'

- |                                 |                                  |                                                                    |
|---------------------------------|----------------------------------|--------------------------------------------------------------------|
| <input type="radio"/> Maxim     | <input type="radio"/> Posit      | <input type="radio"/> Variables                                    |
| <input type="radio"/> Lanugages | <input type="radio"/> Supersedes | <input type="radio"/> None of these words is even remotely related |

**These page timer metrics will not be displayed to the recipient.**

First Click: *0 seconds*

Last Click: *0 seconds*

Page Submit: *0 seconds*

Click Count: *0 clicks*

### 2. What word is most related to 'Words'

- |                                                                    |                                  |                                      |
|--------------------------------------------------------------------|----------------------------------|--------------------------------------|
| <input type="radio"/> Translation                                  | <input type="radio"/> Attributes | <input type="radio"/> Hand           |
| <input type="radio"/> Memory                                       | <input type="radio"/> Confused   | <input type="radio"/> Relative Terms |
| <input type="radio"/> None of these words is even remotely related |                                  |                                      |

**These page timer metrics will not be displayed to the recipient.**

First Click: *0 seconds*

Last Click: *0 seconds*

Page Submit: *0 seconds*

Click Count: *0 clicks*

### 3. What word is most related to 'Quantifiers'

- |                                   |                                 |                                                                    |
|-----------------------------------|---------------------------------|--------------------------------------------------------------------|
| <input type="radio"/> Conjunction | <input type="radio"/> Learning  | <input type="radio"/> Maacah                                       |
| <input type="radio"/> muddled     | <input type="radio"/> Codice 34 | <input type="radio"/> None of these words is even remotely related |

**These page timer metrics will not be displayed to the recipient.**

First Click: *0 seconds*

Last Click: *0 seconds*

Page Submit: *0 seconds*

Click Count: *0 clicks*

#### 4. What word is most related to 'Variables'

- |                                   |                                   |                                                                    |
|-----------------------------------|-----------------------------------|--------------------------------------------------------------------|
| <input type="radio"/> Physicalism | <input type="radio"/> Quantifiers | <input type="radio"/> Pronouns                                     |
| <input type="radio"/> Ésome       | <input type="radio"/> Variable    | <input type="radio"/> None of these words is even remotely related |

**These page timer metrics will not be displayed to the recipient.**

First Click: *0 seconds*

Last Click: *0 seconds*

Page Submit: *0 seconds*

Click Count: *0 clicks*

#### 5. What word is most related to 'Maxim'

- |                                    |                                   |                                                                    |
|------------------------------------|-----------------------------------|--------------------------------------------------------------------|
| <input type="radio"/> Mutilation   | <input type="radio"/> Intuitively | <input type="radio"/> Shallow                                      |
| <input type="radio"/> Dispositions | <input type="radio"/> Phoneme     | <input type="radio"/> None of these words is even remotely related |

**These page timer metrics will not be displayed to the recipient.**

First Click: *0 seconds*

Last Click: *0 seconds*

Page Submit: *0 seconds*

Click Count: *0 clicks*

#### 6. What word is most related to 'Words'

- |                                    |                               |                                   |
|------------------------------------|-------------------------------|-----------------------------------|
| <input type="radio"/> Interchanged | <input type="radio"/> Vocis   | <input type="radio"/> Application |
| <input type="radio"/> Formula 204  | <input type="radio"/> Meaning | <input type="radio"/> Numbers     |

- ☐ None of these words is even remotely related

**These page timer metrics will not be displayed to the recipient.**

First Click: 0 seconds

Last Click: 0 seconds

Page Submit: 0 seconds

Click Count: 0 clicks

## 7. What word is most related to 'Variables'

- |                                                                    |                                         |                                |
|--------------------------------------------------------------------|-----------------------------------------|--------------------------------|
| <input type="radio"/> Quantifiers                                  | <input type="radio"/> Application       | <input type="radio"/> Stavo    |
| <input type="radio"/> Reduction                                    | <input type="radio"/> Logical Particles | <input type="radio"/> Bindable |
| <input type="radio"/> None of these words is even remotely related |                                         |                                |

**These page timer metrics will not be displayed to the recipient.**

First Click: 0 seconds

Last Click: 0 seconds

Page Submit: 0 seconds

Click Count: 0 clicks

## 8. What word is most related to 'Physicalism'

- |                                     |                                   |                                                                    |
|-------------------------------------|-----------------------------------|--------------------------------------------------------------------|
| <input type="radio"/> Brief         | <input type="radio"/> Explicative | <input type="radio"/> Preconceived                                 |
| <input type="radio"/> Ecopsychology | <input type="radio"/> Application | <input type="radio"/> None of these words is even remotely related |

**These page timer metrics will not be displayed to the recipient.**

First Click: 0 seconds

Last Click: 0 seconds

Page Submit: 0 seconds

Click Count: 0 clicks

**9. What word is most related to 'Maxim'**

- |                                  |                                         |                                                                    |
|----------------------------------|-----------------------------------------|--------------------------------------------------------------------|
| <input type="radio"/> Nominalism | <input type="radio"/> Conveys           | <input type="radio"/> Fallacy                                      |
| <input type="radio"/> Fix        | <input type="radio"/> Divided Reference | <input type="radio"/> None of these words is even remotely related |

**These page timer metrics will not be displayed to the recipient.**

First Click: *0 seconds*

Last Click: *0 seconds*

Page Submit: *0 seconds*

Click Count: *0 clicks*

**10. What word is most related to 'Quantifiers'**

- |                                 |                                   |                                                                    |
|---------------------------------|-----------------------------------|--------------------------------------------------------------------|
| <input type="radio"/> Variables | <input type="radio"/> Numbers     | <input type="radio"/> Construction                                 |
| <input type="radio"/> Least     | <input type="radio"/> Existential | <input type="radio"/> None of these words is even remotely related |

**These page timer metrics will not be displayed to the recipient.**

First Click: *0 seconds*

Last Click: *0 seconds*

Page Submit: *0 seconds*

Click Count: *0 clicks*

**11. What word is most related to 'Variables'**

- |                                                                    |                               |                                         |
|--------------------------------------------------------------------|-------------------------------|-----------------------------------------|
| <input type="radio"/> Pixmap                                       | <input type="radio"/> Genuine | <input type="radio"/> Formula 185       |
| <input type="radio"/> Learning                                     | <input type="radio"/> Hoc     | <input type="radio"/> Divided Reference |
| <input type="radio"/> None of these words is even remotely related |                               |                                         |

**These page timer metrics will not be displayed to the recipient.**

First Click: *0 seconds*

Last Click: *0 seconds*

Page Submit: 0 seconds

Click Count: 0 clicks

## 12. What word is most related to 'Physicalism'

- |                                 |                                   |                                                                    |
|---------------------------------|-----------------------------------|--------------------------------------------------------------------|
| <input type="radio"/> Ambiguity | <input type="radio"/> Mentalistic | <input type="radio"/> Caldernzygmund                               |
| <input type="radio"/> Versus    | <input type="radio"/> Sure        | <input type="radio"/> None of these words is even remotely related |

**These page timer metrics will not be displayed to the recipient.**

First Click: 0 seconds

Last Click: 0 seconds

Page Submit: 0 seconds

Click Count: 0 clicks

## 13. What word is most related to 'Maxim'

- |                                 |                                   |                                                                    |
|---------------------------------|-----------------------------------|--------------------------------------------------------------------|
| <input type="radio"/> Castigate | <input type="radio"/> Realisation | <input type="radio"/> Numbers                                      |
| <input type="radio"/> Skeptical | <input type="radio"/> Analysis    | <input type="radio"/> None of these words is even remotely related |

**These page timer metrics will not be displayed to the recipient.**

First Click: 0 seconds

Last Click: 0 seconds

Page Submit: 0 seconds

Click Count: 0 clicks

## 14. What word is most related to 'Words'

- |                                         |                                    |                                                                    |
|-----------------------------------------|------------------------------------|--------------------------------------------------------------------|
| <input type="radio"/> Nominalism        | <input type="radio"/> Conditionals | <input type="radio"/> Ęwhateverí                                   |
| <input type="radio"/> Divided Reference | <input type="radio"/> Strategies   | <input type="radio"/> None of these words is even remotely related |

**These page timer metrics will not be displayed to the recipient.**

First Click: 0 seconds

Last Click: 0 seconds

Page Submit: 0 seconds

Click Count: 0 clicks

### 15. What word is most related to 'Quantifiers'

- ☐ Subtraction
- ☐ Variables
- ☐ Formula 213
- ☐ Quantifications
- ☐ Tasm
- ☐ Variables
- ☐ None of these words is even remotely related

### Outlier questions

The following section contains ten questions in which you are asked to select the word that does not belong to the group.

An example of such a group would be {*cat, dog, banana, mouse*}, where *banana* is the outlier.

If you do not know the meaning of a word you are allowed to look it up, but please do not discuss it with anybody else. If you are really uable to find a connection between the given words, please select the option "None of these words are even remotely related to each other".

These page timer metrics will not be displayed to the recipient.

First Click: 0 seconds

Last Click: 0 seconds

Page Submit: 0 seconds

Click Count: 0 clicks

### 1. What word does not belong to the group?

- ☐ Specious present
- ☐ Learning
- ☐ Words
- ☐ Understand
- ☐ None of these words are even remotely



related to each other

**These page timer metrics will not be displayed to the recipient.**

First Click: *0 seconds*

Last Click: *0 seconds*

Page Submit: *0 seconds*

Click Count: *0 clicks*

## 2, What word does not belong to the group?

- |                                                                                   |                                 |
|-----------------------------------------------------------------------------------|---------------------------------|
| <input type="radio"/> Object                                                      | <input type="radio"/> Affairthe |
| <input type="radio"/> Phoneme                                                     | <input type="radio"/> Recursion |
| <input type="radio"/> None of these words are even remotely related to each other |                                 |

**These page timer metrics will not be displayed to the recipient.**

First Click: *0 seconds*

Last Click: *0 seconds*

Page Submit: *0 seconds*

Click Count: *0 clicks*

## 3. What word does not belong to the group?

- |                                                                                   |                                |
|-----------------------------------------------------------------------------------|--------------------------------|
| <input type="radio"/> Subtraction                                                 | <input type="radio"/> Actually |
| <input type="radio"/> Numbers                                                     | <input type="radio"/> Pronouns |
| <input type="radio"/> None of these words are even remotely related to each other |                                |

**These page timer metrics will not be displayed to the recipient.**

First Click: *0 seconds*

Last Click: *0 seconds*

Page Submit: *0 seconds*

Click Count: *0 clicks*

#### 4. What word does not belong to the group?

- |                                                                                   |                                   |
|-----------------------------------------------------------------------------------|-----------------------------------|
| <input type="radio"/> Utterances                                                  | <input type="radio"/> Translation |
| <input type="radio"/> Learning                                                    | <input type="radio"/> Construe    |
| <input type="radio"/> None of these words are even remotely related to each other |                                   |

**These page timer metrics will not be displayed to the recipient.**

First Click: *0 seconds*

Last Click: *0 seconds*

Page Submit: *0 seconds*

Click Count: *0 clicks*

#### 5. What word does not belong to the group?

- |                                                                                   |                                  |
|-----------------------------------------------------------------------------------|----------------------------------|
| <input type="radio"/> Dispositions                                                | <input type="radio"/> Words      |
| <input type="radio"/> Divided reference                                           | <input type="radio"/> Denotative |
| <input type="radio"/> None of these words are even remotely related to each other |                                  |

**These page timer metrics will not be displayed to the recipient.**

First Click: *0 seconds*

Last Click: *0 seconds*

Page Submit: *0 seconds*

Click Count: *0 clicks*

#### 6. What word does not belong to the group?

- |                                                                                   |                                |
|-----------------------------------------------------------------------------------|--------------------------------|
| <input type="radio"/> Jacobian                                                    | <input type="radio"/> Numbers  |
| <input type="radio"/> Nontrivial                                                  | <input type="radio"/> Algebras |
| <input type="radio"/> None of these words are even remotely related to each other |                                |

**These page timer metrics will not be displayed to the recipient.**

First Click: *0 seconds*

Last Click: *0 seconds*

Page Submit: *0 seconds*

Click Count: *0 clicks*

### 7. What word does not belong to the group?

- |                                                                                   |                                |
|-----------------------------------------------------------------------------------|--------------------------------|
| <input type="radio"/> Specious Present                                            | <input type="radio"/> Svz      |
| <input type="radio"/> Antalls                                                     | <input type="radio"/> Millmans |
| <input type="radio"/> None of these words are even remotely related to each other |                                |

**These page timer metrics will not be displayed to the recipient.**

First Click: *0 seconds*

Last Click: *0 seconds*

Page Submit: *0 seconds*

Click Count: *0 clicks*

### 8. What word does not belong to the group?

- |                                                                                   |                                    |
|-----------------------------------------------------------------------------------|------------------------------------|
| <input type="radio"/> Might                                                       | <input type="radio"/> Learning     |
| <input type="radio"/> Memory                                                      | <input type="radio"/> Dispositions |
| <input type="radio"/> None of these words are even remotely related to each other |                                    |

**These page timer metrics will not be displayed to the recipient.**

First Click: *0 seconds*

Last Click: *0 seconds*

Page Submit: *0 seconds*

Click Count: *0 clicks*

### 9. What word does not belong to the group?

- |                                    |                                  |
|------------------------------------|----------------------------------|
| <input type="radio"/> Dispositions | <input type="radio"/> Understand |
|------------------------------------|----------------------------------|

- ☐ Phoneme
- ☐ None of these words are even remotely related to each other

☐ Words

**These page timer metrics will not be displayed to the recipient.**

First Click: *0 seconds*

Last Click: *0 seconds*

Page Submit: *0 seconds*

Click Count: *0 clicks*

### 10. What word does not belong to the group?

- |                                                                                   |                                  |
|-----------------------------------------------------------------------------------|----------------------------------|
| <input type="radio"/> Divided Reference                                           | <input type="radio"/> Phoneme    |
| <input type="radio"/> Transcompiling                                              | <input type="radio"/> Nederduits |
| <input type="radio"/> None of these words are even remotely related to each other |                                  |

**In this final part of the pilot test a couple of reflective questions are asked. Please answer them truthfully to your experience of the test.**

**How difficult did you find it to select the most related word?**

**On what did you mostly base your choice for the most related word?**

**Did you use another relationship than the ones listed in the instructions (*synonymy, meronymy, hyperonymy, shared super term*) ?**

**Did similarity play a role in your decision for the most related word?**

**How difficult did you find it to identify the outliers of the groups?**

**How did you feel about the length of the test?**

**Did you look up the definitions of many words?**

**If so, what source did you use and did it help you? Did it influence your answers?**

**Do you think your answers differ from someone who has not studied the work of Quine?**

**Were the instructions sufficiently clear? If not, what could have been better?**



**Do you have any recommendations or suggestions to improve the actual study?**



**Thank you so much for participating in this pilot study!**

Powered by Qualtrics
