# Supplementary material
Source: ML conference proceedings conference paper supplement (https://aclanthology.org/2021.humeval-1.12)
Supplement: Dataset [file Synonym_Detection_Task_Part2.pdf › direct-intrinsic-evaluation/Test_results/Synonym_Detection_Task_Part2.pdf]

## **Default Question Block**

### **Relatedness test Quine**

**Thank you for participating in this study.**

**The test is split into two parts, both consisting of 31 questions, of which this is the second. The test will take approximately 50 minutes.**

**The question posed concern the relatedness of terms used by Quine. In the middle of the test, so after 16 questions, there is a small break. After finishing the test, you will be asked to answer a couple of questions reflecting on the test.**

**Please fill out this task in a quiet room with no distractions. You are allowed to look up the meaning of a word, but please do not discuss the meaning with someone else.**

**You will now first be asked to sign a consent form, then you will receive more specific instructions on the task.**

#### **Informed consent form**

**‘I hereby declare that I have been clearly informed about the research project as described in the information brochure. My questions have been answered to my satisfaction.**

**I consent to participate in this research on an entirely voluntary basis. I retain the right to revoke this consent without having to provide any reasons for my decision. I am aware that I am entitled to discontinue the research at any time and can withdraw my participation up to 8 days after the research**

**If my research results are used in scientific publications or made public in any other way, they will be fully anonymised. My personal information may not be viewed by third parties without my express permission.**

**Click to write the question text**

×

SIGN HERE

---

clear

**In the following questions you will be asked to select the word that you think is most related to a given target word. Within the context of this test, relatedness is defined in the following relations:**

- Please do not ask anyone else for the meaning of a term and do not discuss your answers with**

anybody.

The option 'None of these words is even remotely related' can be selected either when you think none of the options have any relation to the target word, or when none of the options are familiar to you.

These page timer metrics will not be displayed to the recipient.

First Click: 0 seconds

Last Click: 0 seconds

Page Submit: 0 seconds

Click Count: 0 clicks

### 1. What word do you think is most related to 'Paradox' ?

- |                                   |                                    |                                                                    |
|-----------------------------------|------------------------------------|--------------------------------------------------------------------|
| <input type="radio"/> Subtraction | <input type="radio"/> Reflects     | <input type="radio"/> About                                        |
| <input type="radio"/> Burali      | <input type="radio"/> Ordered Pair | <input type="radio"/> None of these words is even remotely related |

These page timer metrics will not be displayed to the recipient.

First Click: 0 seconds

Last Click: 0 seconds

Page Submit: 0 seconds

Click Count: 0 clicks

### 2. What word do you think is most related to 'Meaning'?

- |                                                                    |                                       |                                  |
|--------------------------------------------------------------------|---------------------------------------|----------------------------------|
| <input type="radio"/> Empirical                                    | <input type="radio"/> Translation     | <input type="radio"/> Neighborís |
| <input type="radio"/> Intension                                    | <input type="radio"/> Meaninglessness | <input type="radio"/> Objects    |
| <input type="radio"/> None of these words is even remotely related |                                       |                                  |

These page timer metrics will not be displayed to the recipient.

First Click: 0 seconds

Last Click: *0 seconds*

Page Submit: *0 seconds*

Click Count: *0 clicks*

### 3. What word do you think is most related to 'Transparency' ?

- |                                               |                                               |                                                                    |
|-----------------------------------------------|-----------------------------------------------|--------------------------------------------------------------------|
| <input type="radio"/> Propositional Attitudes | <input type="radio"/> Intensional Abstraction | <input type="radio"/> Gtm                                          |
| <input type="radio"/> Unproblematical         | <input type="radio"/> Pitches                 | <input type="radio"/> None of these words is even remotely related |

**These page timer metrics will not be displayed to the recipient.**

First Click: *0 seconds*

Last Click: *0 seconds*

Page Submit: *0 seconds*

Click Count: *0 clicks*

### 4. What word do you think is most related to 'Mental States' ?

- |                              |                                     |                                                                    |
|------------------------------|-------------------------------------|--------------------------------------------------------------------|
| <input type="radio"/> United | <input type="radio"/> Supplementing | <input type="radio"/> Physicalism                                  |
| <input type="radio"/> Colish | <input type="radio"/> Adjectives    | <input type="radio"/> None of these words is even remotely related |

**These page timer metrics will not be displayed to the recipient.**

First Click: *0 seconds*

Last Click: *0 seconds*

Page Submit: *0 seconds*

Click Count: *0 clicks*

### 5. What word do you think is most related to 'Adjectives' ?

- |                                        |                                   |                                                                    |
|----------------------------------------|-----------------------------------|--------------------------------------------------------------------|
| <input type="radio"/> Specious Present | <input type="radio"/> Translation | <input type="radio"/> Modifiers                                    |
| <input type="radio"/> Verbs            | <input type="radio"/> Embodying   | <input type="radio"/> None of these words is even remotely related |

**These page timer metrics will not be displayed to the recipient.**

First Click: *0 seconds*

Last Click: *0 seconds*

Page Submit: *0 seconds*

Click Count: *0 clicks*

**6. What word do you think is most related to 'Attributes' ?**

- |                                 |                                    |                                                                    |
|---------------------------------|------------------------------------|--------------------------------------------------------------------|
| <input type="radio"/> Calculus  | <input type="radio"/> Conditioning | <input type="radio"/> Predicate                                    |
| <input type="radio"/> Intension | <input type="radio"/> Resultant    | <input type="radio"/> None of these words is even remotely related |

**These page timer metrics will not be displayed to the recipient.**

First Click: *0 seconds*

Last Click: *0 seconds*

Page Submit: *0 seconds*

Click Count: *0 clicks*

**7. What word do you think is most related to 'Sense Datum' ?**

- |                                                                    |                                   |                              |
|--------------------------------------------------------------------|-----------------------------------|------------------------------|
| <input type="radio"/> Ideas                                        | <input type="radio"/> Description | <input type="radio"/> Vidari |
| <input type="radio"/> Paradox                                      | <input type="radio"/> Sphere      | <input type="radio"/> Ors    |
| <input type="radio"/> None of these words is even remotely related |                                   |                              |

**These page timer metrics will not be displayed to the recipient.**

First Click: *0 seconds*

Last Click: *0 seconds*

Page Submit: *0 seconds*

Click Count: *0 clicks*

**8. What word do you think is most related to 'Relative Terms' ?**

- |                                        |                             |                              |
|----------------------------------------|-----------------------------|------------------------------|
| <input type="radio"/> Protosyntactical | <input type="radio"/> Ideas | <input type="radio"/> Spaced |
|----------------------------------------|-----------------------------|------------------------------|

- ☐ Divided Reference      ☐ Conditionals      ☐ None of these words is even remotely related

**These page timer metrics will not be displayed to the recipient.**

First Click: 0 seconds

Last Click: 0 seconds

Page Submit: 0 seconds

Click Count: 0 clicks

**9. What word do you think is most related to 'Intension' ?**

- ☐ Complements      ☐ Words      ☐ Haneullim  
☐ Inconsistencies      ☐ Logical Particles      ☐ None of these words is even remotely related

**These page timer metrics will not be displayed to the recipient.**

First Click: 0 seconds

Last Click: 0 seconds

Page Submit: 0 seconds

Click Count: 0 clicks

**10. What word do you think is most related to 'Object' ?**

- ☐ Incorrect      ☐ Quantification      ☐ Objects  
☐ Phoneme      ☐ Translation      ☐ None of these words is even remotely related

**These page timer metrics will not be displayed to the recipient.**

First Click: 0 seconds

Last Click: 0 seconds

Page Submit: 0 seconds

Click Count: 0 clicks

**11. What word do you think is most related to 'Posit' ?**

- |                                             |                                  |                                                                    |
|---------------------------------------------|----------------------------------|--------------------------------------------------------------------|
| <input type="radio"/> Impressions           | <input type="radio"/> About      | <input type="radio"/> Positing                                     |
| <input type="radio"/> Observation Sentences | <input type="radio"/> Prediction | <input type="radio"/> None of these words is even remotely related |

**These page timer metrics will not be displayed to the recipient.**

First Click: *0 seconds*

Last Click: *0 seconds*

Page Submit: *0 seconds*

Click Count: *0 clicks*

**12. What word do you think is most related to 'Logical Particles' ?**

- |                                   |                                 |                                                                    |
|-----------------------------------|---------------------------------|--------------------------------------------------------------------|
| <input type="radio"/> Lebesgue's  | <input type="radio"/> Focal     | <input type="radio"/> Zoocoffee                                    |
| <input type="radio"/> Facilitated | <input type="radio"/> Intension | <input type="radio"/> None of these words is even remotely related |

**These page timer metrics will not be displayed to the recipient.**

First Click: *0 seconds*

Last Click: *0 seconds*

Page Submit: *0 seconds*

Click Count: *0 clicks*

**13. What word do you think is most related to 'Meaning' ?**

- |                                               |                                    |                                                                    |
|-----------------------------------------------|------------------------------------|--------------------------------------------------------------------|
| <input type="radio"/> Intensional Abstraction | <input type="radio"/> However      | <input type="radio"/> Stimulus                                     |
| <input type="radio"/> Attributes              | <input type="radio"/> Transparency | <input type="radio"/> None of these words is even remotely related |

**These page timer metrics will not be displayed to the recipient.**

First Click: *0 seconds*

Last Click: *0 seconds*

Page Submit: *0 seconds*

Click Count: 0 clicks

#### 14. What word is most related to 'Relative Terms'

- |                                                                    |                                  |                                     |
|--------------------------------------------------------------------|----------------------------------|-------------------------------------|
| <input type="radio"/> Lopped                                       | <input type="radio"/> Ambiguity  | <input type="radio"/> Nouns         |
| <input type="radio"/> Demonstrable                                 | <input type="radio"/> Adjectival | <input type="radio"/> Mental States |
| <input type="radio"/> None of these words is even remotely related |                                  |                                     |

**These page timer metrics will not be displayed to the recipient.**

First Click: 0 seconds

Last Click: 0 seconds

Page Submit: 0 seconds

Click Count: 0 clicks

#### 15. What word is most related to 'Confirmation'

- |                                       |                                        |                                                                    |
|---------------------------------------|----------------------------------------|--------------------------------------------------------------------|
| <input type="radio"/> Disconfirmation | <input type="radio"/> About            | <input type="radio"/> Plausibility                                 |
| <input type="radio"/> Slater          | <input type="radio"/> Specious Present | <input type="radio"/> None of these words is even remotely related |

**These page timer metrics will not be displayed to the recipient.**

First Click: 0 seconds

Last Click: 0 seconds

Page Submit: 0 seconds

Click Count: 0 clicks

#### 16. What word do you think is most related to 'Posit' ?

- |                                   |                                               |                                                                    |
|-----------------------------------|-----------------------------------------------|--------------------------------------------------------------------|
| <input type="radio"/> Certainty   | <input type="radio"/> Ask                     | <input type="radio"/> Welcomed                                     |
| <input type="radio"/> Formula 170 | <input type="radio"/> Intensional Abstraction | <input type="radio"/> None of these words is even remotely related |



## Break

**You are now halfway through the test.**

**You can take a small break, and go to the next page whenever you are ready to continue.**

**These page timer metrics will not be displayed to the recipient.**

First Click: *0 seconds*

Last Click: *0 seconds*

Page Submit: *0 seconds*

Click Count: *0 clicks*

**17. What word do you think is most related to 'Object' ?**

- |                                   |                                  |                                                                    |
|-----------------------------------|----------------------------------|--------------------------------------------------------------------|
| <input type="radio"/> Single      | <input type="radio"/> Ambiguity  | <input type="radio"/> Utterances                                   |
| <input type="radio"/> Declarative | <input type="radio"/> Hyperedges | <input type="radio"/> None of these words is even remotely related |

**These page timer metrics will not be displayed to the recipient.**

First Click: *0 seconds*

Last Click: *0 seconds*

Page Submit: *0 seconds*

Click Count: *0 clicks*

**18. What word do you think is most related to 'Sense Datum' ?**

- |                               |                                    |                                                                    |
|-------------------------------|------------------------------------|--------------------------------------------------------------------|
| <input type="radio"/> Picks   | <input type="radio"/> Prediction   | <input type="radio"/> Flimsy                                       |
| <input type="radio"/> Knaanic | <input type="radio"/> Construction | <input type="radio"/> None of these words is even remotely related |

**These page timer metrics will not be displayed to the recipient.**

First Click: *0 seconds*

Last Click: *0 seconds*

Page Submit: *0 seconds*

Click Count: 0 clicks

### 19. What word do you think is most related to 'Memory' ?

- |                                  |                                   |                                                                    |
|----------------------------------|-----------------------------------|--------------------------------------------------------------------|
| <input type="radio"/> Contiguity | <input type="radio"/> Vira        | <input type="radio"/> Whoit                                        |
| <input type="radio"/> Reduction  | <input type="radio"/> Mentalistic | <input type="radio"/> None of these words is even remotely related |

**These page timer metrics will not be displayed to the recipient.**

First Click: 0 seconds

Last Click: 0 seconds

Page Submit: 0 seconds

Click Count: 0 clicks

### 20. What word do you think is most related to 'Quantification' ?

- |                                                                    |                                               |                                    |
|--------------------------------------------------------------------|-----------------------------------------------|------------------------------------|
| <input type="radio"/> Existential                                  | <input type="radio"/> Propositional           | <input type="radio"/> Immanently   |
| <input type="radio"/> Reality                                      | <input type="radio"/> Propositional Attitudes | <input type="radio"/> Construction |
| <input type="radio"/> None of these words is even remotely related |                                               |                                    |

**These page timer metrics will not be displayed to the recipient.**

First Click: 0 seconds

Last Click: 0 seconds

Page Submit: 0 seconds

Click Count: 0 clicks

### 21. What word do you think is most related to 'Observation Sentences' ?

- |                                   |                                 |                                                                    |
|-----------------------------------|---------------------------------|--------------------------------------------------------------------|
| <input type="radio"/> Ideas       | <input type="radio"/> Despite   | <input type="radio"/> Posit                                        |
| <input type="radio"/> Recantation | <input type="radio"/> Variables | <input type="radio"/> None of these words is even remotely related |

**These page timer metrics will not be displayed to the recipient.**

First Click: 0 seconds

Last Click: 0 seconds

Page Submit: 0 seconds

Click Count: 0 clicks

## 22. What word do you think is most related to 'Quantification' ?

- |                                                                    |                               |                                  |
|--------------------------------------------------------------------|-------------------------------|----------------------------------|
| <input type="radio"/> Meaninglessness                              | <input type="radio"/> Parts   | <input type="radio"/> Theory     |
| <input type="radio"/> Subsume                                      | <input type="radio"/> Boolean | <input type="radio"/> Nominalism |
| <input type="radio"/> None of these words is even remotely related |                               |                                  |

**These page timer metrics will not be displayed to the recipient.**

First Click: 0 seconds

Last Click: 0 seconds

Page Submit: 0 seconds

Click Count: 0 clicks

## 23. What word do you think is most related to 'Adjectives' ?

- |                                               |                                   |                                                                    |
|-----------------------------------------------|-----------------------------------|--------------------------------------------------------------------|
| <input type="radio"/> Praised                 | <input type="radio"/> Attributive | <input type="radio"/> Nouns                                        |
| <input type="radio"/> Intensional Abstraction | <input type="radio"/> Attributes  | <input type="radio"/> None of these words is even remotely related |

**These page timer metrics will not be displayed to the recipient.**

First Click: 0 seconds

Last Click: 0 seconds

Page Submit: 0 seconds

Click Count: 0 clicks

## 24. What word do you think is most related to 'About' ?

- |                                             |                                  |                                                   |
|---------------------------------------------|----------------------------------|---------------------------------------------------|
| <input type="radio"/> Observation Sentences | <input type="radio"/> Attributes | <input type="radio"/> Anything                    |
| <input type="radio"/> Comprehend            | <input type="radio"/> Altogether | <input type="radio"/> None of these words is even |

**These page timer metrics will not be displayed to the recipient.**

First Click: *0 seconds*

Last Click: *0 seconds*

Page Submit: *0 seconds*

Click Count: *0 clicks*

**25. What word do you think is most related to 'Observation Sentences' ?**

- |                                        |                                               |                                                                    |
|----------------------------------------|-----------------------------------------------|--------------------------------------------------------------------|
| <input type="radio"/> Observationality | <input type="radio"/> Adaptionist             | <input type="radio"/> Evaluation                                   |
| <input type="radio"/> Memory           | <input type="radio"/> Intensional Abstraction | <input type="radio"/> None of these words is even remotely related |

**These page timer metrics will not be displayed to the recipient.**

First Click: *0 seconds*

Last Click: *0 seconds*

Page Submit: *0 seconds*

Click Count: *0 clicks*

**26. What word do you think is most related to 'Transparency' ?**

- |                                   |                                     |                                                                    |
|-----------------------------------|-------------------------------------|--------------------------------------------------------------------|
| <input type="radio"/> Manifests   | <input type="radio"/> Mental States | <input type="radio"/> Attributes                                   |
| <input type="radio"/> Explicative | <input type="radio"/> Zwemers       | <input type="radio"/> None of these words is even remotely related |

**These page timer metrics will not be displayed to the recipient.**

First Click: *0 seconds*

Last Click: *0 seconds*

Page Submit: *0 seconds*

Click Count: *0 clicks*

**27. What word do you think is most related to 'Logical Particles' ?**

- |                                             |                                |                                                                    |
|---------------------------------------------|--------------------------------|--------------------------------------------------------------------|
| <input type="radio"/> Observation Sentences | <input type="radio"/> Universe | <input type="radio"/> Categorical                                  |
| <input type="radio"/> Variables             | <input type="radio"/> Clauses  | <input type="radio"/> None of these words is even remotely related |

**These page timer metrics will not be displayed to the recipient.**

First Click: 0 seconds

Last Click: 0 seconds

Page Submit: 0 seconds

Click Count: 0 clicks

## 29. What word do you think is most related to 'Information' ?

- |                                   |                                  |                                                                    |
|-----------------------------------|----------------------------------|--------------------------------------------------------------------|
| <input type="radio"/> Mentalistic | <input type="radio"/> Saw        | <input type="radio"/> Ideas                                        |
| <input type="radio"/> Intrusive   | <input type="radio"/> Comprehend | <input type="radio"/> None of these words is even remotely related |

**These page timer metrics will not be displayed to the recipient.**

First Click: 0 seconds

Last Click: 0 seconds

Page Submit: 0 seconds

Click Count: 0 clicks

## 28. What word do you think is most related to 'Utterances' ?

- |                                                                    |                                |                                  |
|--------------------------------------------------------------------|--------------------------------|----------------------------------|
| <input type="radio"/> Ostension                                    | <input type="radio"/> Learning | <input type="radio"/> Nouns      |
| <input type="radio"/> Objects                                      | <input type="radio"/> Sounded  | <input type="radio"/> Adjectives |
| <input type="radio"/> None of these words is even remotely related |                                |                                  |

**These page timer metrics will not be displayed to the recipient.**

First Click: 0 seconds

Last Click: 0 seconds

Page Submit: 0 seconds

Click Count: 0 clicks

**30. What word do you think is most related to 'Information' ?**

- |                                   |                                  |                                                                    |
|-----------------------------------|----------------------------------|--------------------------------------------------------------------|
| <input type="radio"/> Application | <input type="radio"/> Reduction  | <input type="radio"/> Ordered Pair                                 |
| <input type="radio"/> Learning    | <input type="radio"/> Collateral | <input type="radio"/> None of these words is even remotely related |

**These page timer metrics will not be displayed to the recipient.**

First Click: *0 seconds*

Last Click: *0 seconds*

Page Submit: *0 seconds*

Click Count: *0 clicks*

**31. What word do you think is most related to 'Truth Vehicles' ?**

- |                                                                    |                                   |                                   |
|--------------------------------------------------------------------|-----------------------------------|-----------------------------------|
| <input type="radio"/> Copy                                         | <input type="radio"/> Agnosticism | <input type="radio"/> Application |
| <input type="radio"/> Juw                                          | <input type="radio"/> Adhere      | <input type="radio"/> About       |
| <input type="radio"/> None of these words is even remotely related |                                   |                                   |

**Thank you for filling out all of the questions.**

**In this final part of the test a couple of reflective questions are asked. Please answer them truthfully to your experience.**

**Generally, how difficult did you find it to select the most related word?**

**On what did you mostly base your choice for the most related word?**

**Have you used another relationship than the ones listed in the instructions (synonymy, meronymy, hyperonymy, shared super term) ?**



**Have you looked up many definitions?**

**If so, what source did you use and did it help you? Do you think it has influenced any of your answers?**



**Did your experience of filling out this second part differ from filling out the first part of the test?**

**If so, how?**



**Do you have any other comments or remarks about the test in general?**



**Thank you so much for completing the second part of the test!**

Powered by Qualtrics
